# Supplementary material
Source: PubMed Central journal article supplement (PMC1820910)
Supplement: plntphys_pp.106.091561_2.pdf [file plntphys_pp.106.091561_2.pdf]

**Supplemental figure 1. Alignment of rice and Arabidopsis YUCCA and YUCCA-like proteins.**

Black and gray boxes indicate identical and similar amino acids, respectively. The putative FAD and NADPH binding motifs are boxed.
